# Supplementary material for: Herpes simplex encephalitis in adult patients with MASP-2 deficiency
Source: PubMed Central journal article supplement (PMC6944389; doi:10.1371/journal.ppat.1008168), 2019-12-23
Supplement: ppat.1008168.s006.pdf [file ppat.1008168.s006.pdf]

| <b>Primer</b>                 | <b>Sequence</b>         |
|-------------------------------|-------------------------|
| 18S ribosomal subunit Reverse | AATGAGCCATTCGCAGTTTCA   |
| 18S ribosomal subunit Forward | TGCATGTCTAAGTACGCACGG   |
| IFN- $\alpha$ Reverse         | TTCTGCTCTGACCACCTCCC    |
| IFN- $\alpha$ Forward         | TTCCACAGGATCACTGTGTACCT |
| IFN- $\beta$ Reverse          | GGCGTAGCTGTTGTACTTCATGA |
| IFN- $\beta$ Forward          | TACTGGAGGGTGCAAAGGTACC  |
